# Supplementary material for: The Façade, the Face, and the Sympathies: Opening the Black Box of Symbolic Capital as a Source of Philanthropic Attractiveness
Source: Atypon-hosted journal article supplement (doi:10.1287/orsc.2022.1603), 2022-06-02
Supplement: orsc.2022.1603.sm2.pdf [file orsc.2022.1603.sm2.pdf]

## APPENDIX 2

### Probit Estimates

**TABLE 10**

*Full Probit Models for Hypotheses 1a-1c*

|                                 | Model 1  | Model 2 | Model 3 | Model 4 | Model 5   | Model 6      |
|---------------------------------|----------|---------|---------|---------|-----------|--------------|
| D.V.: Corp. benefaction/Hyp.    | Baseline | H1a-H1b | H1c     |         |           |              |
| Federal status                  |          | 2.166   | 1.143   | 1.775   | 1.750     | 1.972        |
|                                 |          | (0.054) | (0.214) | (0.091) | (0.06)    | (0.085)      |
| Age cohort                      |          |         |         |         |           |              |
| 10-20                           |          | -0.323  | -0.313  | -0.311  | 0.065     | -0.27        |
|                                 |          | (0.043) | (0.034) | (0.044) | (0.028)   | (0.038)      |
| 21-30                           |          | 2.025   | 2.031   | 2.047   | 1.972     | 2.043        |
|                                 |          | (0.039) | (0.043) | (0.043) | (0.068)   | (0.070)      |
| 31-60                           |          | 2.550   | 2.576   | 2.584   | 1.439     | 2.676        |
|                                 |          | (0.031) | (0.052) | (0.054) | (0.036)   | (0.084)      |
| 61-80                           |          | 3.430   | 3.427   | 3.413   | 2.029     | 3.427        |
|                                 |          | (0.074) | (0.077) | (0.075) | (0.019)   | (0.073)      |
| > 80                            |          | 2.331   | 2.331   | 2.316   | 2.434     | 2.511        |
|                                 |          | (0.088) | (0.053) | (0.053) | (0.135)   | (0.126)      |
| Celebrity                       |          | 3.582   | 3.541   | 3.645   | 1.528     | 3.612        |
|                                 |          | (0.061) | (0.056) | (0.063) | (0.074)   | (0.070)      |
| Total nominations               |          | 2.203   | 2.203   | 2.069   | 2.198     | 2.332        |
|                                 |          | (0.023) | (0.023) | (0.030) | (0.026)   | (0.263)      |
| Federal status × Celebrity      |          |         | 4.268   |         |           |              |
|                                 |          |         | (0.418) |         |           |              |
| Federal status × Total nom.     |          |         |         | 2.109   |           |              |
|                                 |          |         |         | (0.492) |           |              |
| Age cohort × Celebr./Total nom. |          |         |         |         | × Celebr. | × Total nom. |
| 10-20 × Celebr./Total nom.      |          |         |         |         | 2.353     | -0.374       |
|                                 |          |         |         |         | (0.637)   | (0.152)      |
| 21-30 × Celebr./Total nom.      |          |         |         |         | 3.96      | -0.529       |
|                                 |          |         |         |         | (0.385)   | (0.262)      |
| 31-60 × Celebr./Total nom.      |          |         |         |         | 9.087     | -0.713       |
|                                 |          |         |         |         | (0.723)   | (0.365)      |
| 61-80 × Celebr./Total nom.      |          |         |         |         | 7.725     | -0.780       |
|                                 |          |         |         |         | (0.560)   | (0.970)      |
| > 80 × Celebr./ Total nom.      |          |         |         |         | 50.399    | 1.996        |
|                                 |          |         |         |         | (0.443)   | (0.939)      |
| Pro-government orientation      |          | -0.057  | -0.057  | -0.057  | -0.747    | -0.045       |
|                                 |          | (0.009) | (0.009) | (0.010) | (0.201)   | (0.009)      |
| Opposition                      |          | 1.893   | 1.886   | 1.899   | 1.938     | 1.894        |
|                                 |          | (0.977) | (0.975) | (0.976) | (0.972)   | (0.972)      |
| Board of trustees               |          | 64.095  | 62.232  | 64.288  | 83.46     | 62.451       |

|                                                                                                                   |         |         |         |         |         |         |
|-------------------------------------------------------------------------------------------------------------------|---------|---------|---------|---------|---------|---------|
|                                                                                                                   |         | (0.125) | (0.135) | (0.131) | (0.101) | (0.101) |
| Size                                                                                                              | 1.952   | 1.875   | 1.874   | 1.876   | 1.886   | 1.876   |
|                                                                                                                   | (0.005) | (0.005) | (0.005) | (0.005) | (0.005) | (0.005) |
| Density                                                                                                           | -0.86   | -0.851  | -0.851  | -0.851  | -0.852  | -0.854  |
|                                                                                                                   | (0.001) | (0.001) | (0.001) | (0.001) | (0.002) | (0.001) |
| Profitability                                                                                                     | 1.879   | 1.882   | 1.883   | 1.882   | 1.881   | 1.881   |
|                                                                                                                   | (0.002) | (0.001) | (0.002) | (0.001) | (0.001) | (0.001) |
| Observations                                                                                                      | 3,340   | 3,340   | 3,340   | 3,340   | 3,340   | 3,340   |
| Pseudo R-squared                                                                                                  | 0.213   | 0.278   | 0.278   | 0.278   | 0.288   | 0.278   |
| D.V.: Corporate benefaction. Probit coefficients. Standard errors are given in parentheses below the coefficient. |         |         |         |         |         |         |

**TABLE 11**

*Full Probit Models for Hypothesis 2a*

|                                 | Model 7 | Model 8 | Model 9 | Model 10 |
|---------------------------------|---------|---------|---------|----------|
| Corp. benefaction               | H2a     |         |         |          |
| Federal status                  | 1.926   | 2.434   | 2.334   | 2.233    |
|                                 | (0.069) | (0.070) | (0.060) | (0.049)  |
| Age cohort                      |         |         |         |          |
| 10-20                           | 2.456   | -0.499  | -0.590  | -0.627   |
|                                 | (0.057) | (0.050) | (0.047) | (0.467)  |
| 21-30                           | 1.968   | 2.022   | 2.062   | 2.02     |
|                                 | (0.027) | (0.048) | (0.027) | (0.035)  |
| 31-60                           | 2.584   | 2.121   | 2.569   | 2.575    |
|                                 | (0.033) | (0.077) | (0.066) | (0.035)  |
| 61-80                           | 2.694   | 2.676   | 2.676   | 2.703    |
|                                 | (0.072) | (0.116) | (0.058) | (0.067)  |
| > 80                            | 2.474   | 2.168   | 2.575   | 2.628    |
|                                 | (0.076) | (0.073) | (0.034) | (0.063)  |
| Celebrity                       | 2.988   | 3.099   | 2.004   | 3.023    |
|                                 | (0.038) | (0.042) | (0.034) | (0.041)  |
| Total nominations               | 2.331   | 2.267   | 2.204   | 2.084    |
|                                 | (0.027) | (0.025) | (0.022) | (0.027)  |
| Pro-government orientation      | -0.779  | -0.800  | -0.351  | -0.743   |
|                                 | (0.030) | (0.030) | (0.027) | (0.030)  |
| Federal status × Pro-government | 9.585   |         |         |          |
|                                 | (1.179) |         |         |          |
| Age cohort × Pro-government     |         |         |         |          |
| 10-20 × Pro-gov.                |         | 3.870   |         |          |
|                                 |         | (0.097) |         |          |
| 21-30 × Pro-gov.                |         | 2.142   |         |          |
|                                 |         | (0.291) |         |          |
| 31-60 × Pro-gov.                |         | -0.406  |         |          |
|                                 |         | (0.145) |         |          |
| 61-80 × Pro-gov.                |         | 4.906   |         |          |
|                                 |         | (0.086) |         |          |
| > 80 × Pro-gov.                 |         | 1.800   |         |          |

|                                                                                                                   |         |         |         |         |
|-------------------------------------------------------------------------------------------------------------------|---------|---------|---------|---------|
|                                                                                                                   |         | (0.374) |         |         |
| Celebrity × Pro-government                                                                                        |         |         | 29.148  |         |
|                                                                                                                   |         |         | (0.425) |         |
| Total nom. × Pro-government                                                                                       |         |         |         | 2.287   |
|                                                                                                                   |         |         |         | (0.053) |
| Opposition                                                                                                        | 1.935   | -0.693  | 2.020   | 1.963   |
|                                                                                                                   | (0.025) | (0.091) | (0.035) | (0.027) |
| Board of trustees                                                                                                 | 44.413  | 45.846  | 48.072  | 38.593  |
|                                                                                                                   | (2.020) | (2.280) | (2.271) | (2.101) |
| Size                                                                                                              | 1.924   | 1.922   | 1.937   | 1.925   |
|                                                                                                                   | (0.006) | (0.005) | (0.006) | (0.006) |
| Density                                                                                                           | -0.900  | -0.900  | -0.899  | -0.900  |
|                                                                                                                   | (0.001) | (0.001) | (0.001) | (0.001) |
| Profitability                                                                                                     | (1.934  | 1.935   | 1.935   | 1.934   |
|                                                                                                                   | (0.001) | (0.001) | (0.001) | (0.002) |
| Observations                                                                                                      | 3,340   | 3,340   | 3,340   | 3,340   |
| Pseudo R-squared                                                                                                  | 0.282   | 0.282   | 0.288   | 0.280   |
| D.V.: Corporate benefaction. Probit coefficients. Standard errors are given in parentheses below the coefficient. |         |         |         |         |

**TABLE 12**

*Full Probit Models for Hypotheses H2b-H3b*

|                         | Model 11 | Model 12 | Model 13 | Model 14 | Model 15 | Model 16 |
|-------------------------|----------|----------|----------|----------|----------|----------|
| Corp. benefaction       | H2b      |          | H3a      |          | H3b      |          |
| Federal status          | 2.395    | 2.203    | 2.808    | 2.203    | 2.242    | 2.181    |
|                         | (0.067)  | (0.054)  | (0.115)  | (0.077)  | (0.074)  | (0.074)  |
| Age cohort              |          |          |          |          |          |          |
| 10-20                   | -0.597   | -0.574   | -0.604   | -0.521   | -0.593   | -0.590   |
|                         | (0.055)  | (0.052)  | (0.048)  | (0.036)  | (0.050)  | (0.049)  |
| 21-30                   | 2.016    | 1.943    | 1.916    | 1.828    | 1.977    | 1.938    |
|                         | (0.038)  | (0.039)  | (0.040)  | (0.030)  | (0.037)  | (0.040)  |
| 31-60                   | 2.466    | 2.459    | 2.421    | 2.253    | 2.491    | 2.457    |
|                         | (0.039)  | (0.062)  | (0.035)  | (0.040)  | (0.064)  | (0.038)  |
| 61-80                   | 2.538    | 2.547    | 2.574    | 2.258    | 2.574    | 2.566    |
|                         | (0.079)  | (0.079)  | (0.079)  | (0.053)  | (0.078)  | (0.079)  |
| > 80                    | 2.460    | 2.454    | 2.468    | 2.254    | 2.462    | 2.482    |
|                         | (0.040)  | (0.035)  | (0.061)  | (0.040)  | (0.037)  | (0.065)  |
| Celebrity               | 4.022    | 2.836    | 2.900    | 2.878    | 2.965    | 2.878    |
|                         | (0.101)  | (0.047)  | (0.045)  | (0.045)  | (0.045)  | (0.045)  |
| Total nominations       | 2.161    | 2.236    | 2.190    | 2.187    | 2.188    | 2.232    |
|                         | (0.025)  | (0.028)  | (0.025)  | (0.026)  | (0.025)  | (0.029)  |
| Opposition              | 1.949    | 1.917    | -0.858   | 1.865    | 1.894    | 1.931    |
|                         | (0.090)  | (0.031)  | (0.027)  | (0.028)  | (0.028)  | (0.019)  |
| Celebrity × Opposition  | -0.184   |          |          |          |          |          |
|                         | (0.035)  |          |          |          |          |          |
| Total nom. × Opposition |          | -0.678   |          |          |          |          |
|                         |          | (0.059)  |          |          |          |          |

|                                                                                                                   |         |         |         |         |         |         |
|-------------------------------------------------------------------------------------------------------------------|---------|---------|---------|---------|---------|---------|
| Pro-government orientation                                                                                        | -0.719  | -0.721  | -0.720  | -0.756  | -0.964  | -0.963  |
|                                                                                                                   | (0.948) | (0.946) | (0.945) | (0.970) | (0.974) | (0.972) |
| Board of trustees                                                                                                 | 44.827  | 36.357  | 29.616  | 1.296   | 553.703 | 63.262  |
|                                                                                                                   | (0.102) | (0.136) | (0.131) | (0.734) | (0.149) | (0.124) |
| Federal status × Board of trustees                                                                                |         |         | 1.939   |         |         |         |
|                                                                                                                   |         |         | (0.988) |         |         |         |
| Age cohort × Board of trustees                                                                                    |         |         |         |         |         |         |
| 10-20                                                                                                             |         |         |         | 5.035   |         |         |
|                                                                                                                   |         |         |         | (0.228) |         |         |
| 21-30                                                                                                             |         |         |         | 28.415  |         |         |
|                                                                                                                   |         |         |         | (0.001) |         |         |
| 31-60                                                                                                             |         |         |         | 113.123 |         |         |
|                                                                                                                   |         |         |         | (0.001) |         |         |
| 61-80                                                                                                             |         |         |         | 643.427 |         |         |
|                                                                                                                   |         |         |         | (0.001) |         |         |
| > 80                                                                                                              |         |         |         | 82.070  |         |         |
|                                                                                                                   |         |         |         | (0.001) |         |         |
| Celebrity × Board of trustees                                                                                     |         |         |         |         | 1.175   |         |
|                                                                                                                   |         |         |         |         | (0.948) |         |
| Total nom. × Board of trustees                                                                                    |         |         |         |         |         | 1.580   |
|                                                                                                                   |         |         |         |         |         | (0.959) |
| Size                                                                                                              | 1.867   | 1.865   | 1.861   | 1.866   | 1.866   | 1.864   |
|                                                                                                                   | (0.006) | (0.006) | (0.006) | (0.006) | (0.006) | (0.006) |
| Density                                                                                                           | -0.843  | -0.842  | -0.842  | -0.841  | -0.843  | -0.842  |
|                                                                                                                   | (0.002) | (0.001) | (0.001) | (0.001) | (0.001) | (0.001) |
| Profitability                                                                                                     | 1.876   | 1.873   | 1.873   | 1.872   | 1.873   | 1.873   |
|                                                                                                                   | (0.001) | (0.001) | (0.001) | (0.001) | (0.001) | (0.001) |
| Observations                                                                                                      | 3,340   | 3,340   | 3,340   | 3,340   | 3,340   | 3,340   |
| Pseudo R-squared                                                                                                  | 0.286   | 0.277   | 0.284   | 0.284   | 0.281   | 0.281   |
| D.V.: Corporate benefaction. Probit coefficients. Standard errors are given in parentheses below the coefficient. |         |         |         |         |         |         |
